# Supplementary material
Source: PubMed Central journal article supplement (PMC5649023)
Supplement: IAI.00338-17_zii999092193s1.pdf [file IAI.00338-17_zii999092193s1.pdf]

Supplemental Material

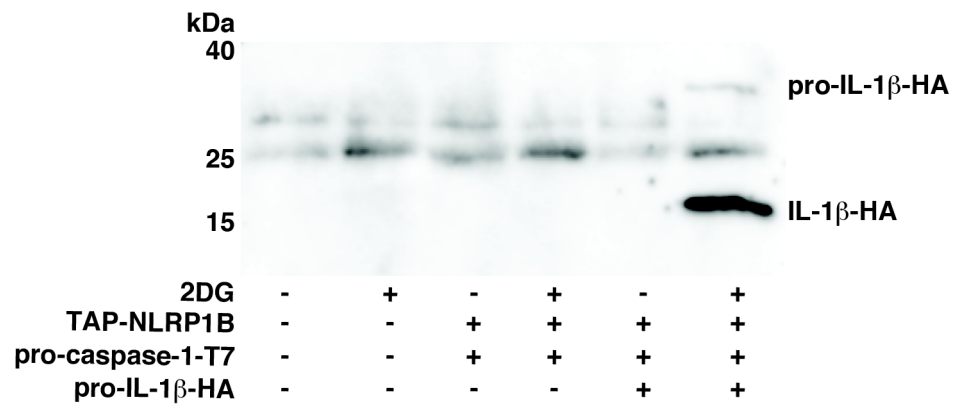

Fig. S1. IL-1 $\beta$  released from HT1080 fibroblasts. HT1080 cells were transfected with inflammasome components and treated with 2DG (in serum-free, glucose-free DMEM) as indicated. IL-1 $\beta$ -HA was immunoprecipitated from cell supernatants and probed with an anti-HA antibody. Note non-specific bands of ~25 kDa.

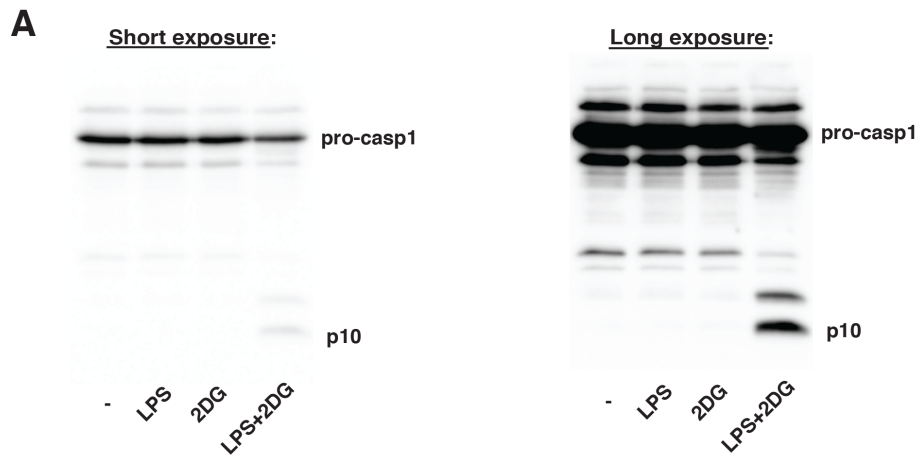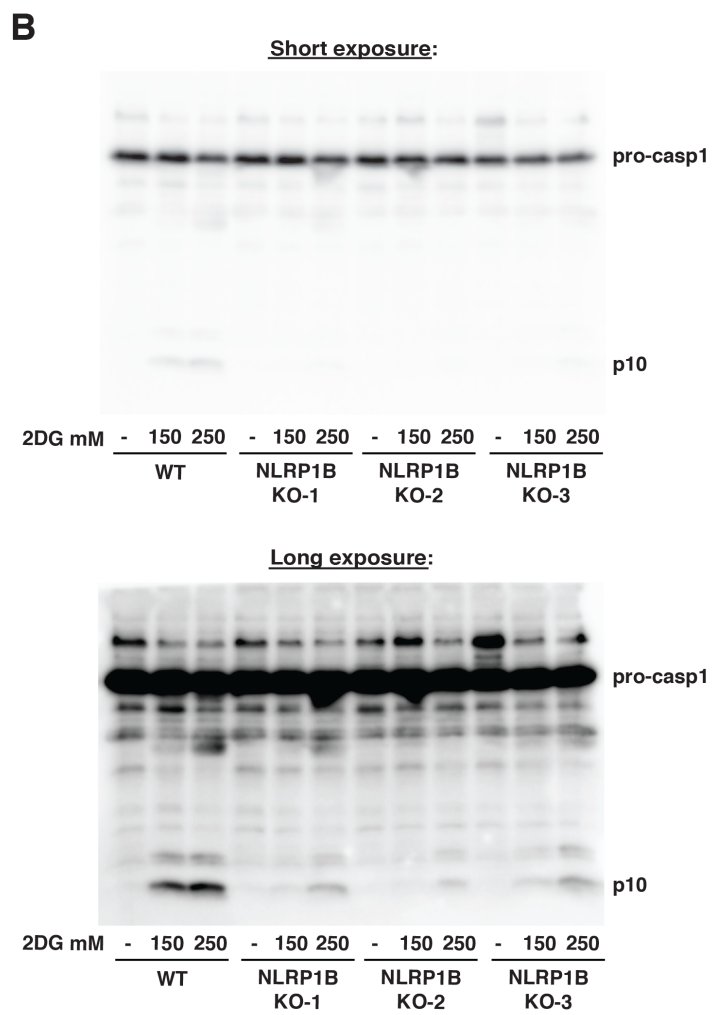

Fig. S2. Long and short exposures of entire blots used in Fig. 4.

**A**Short exposure: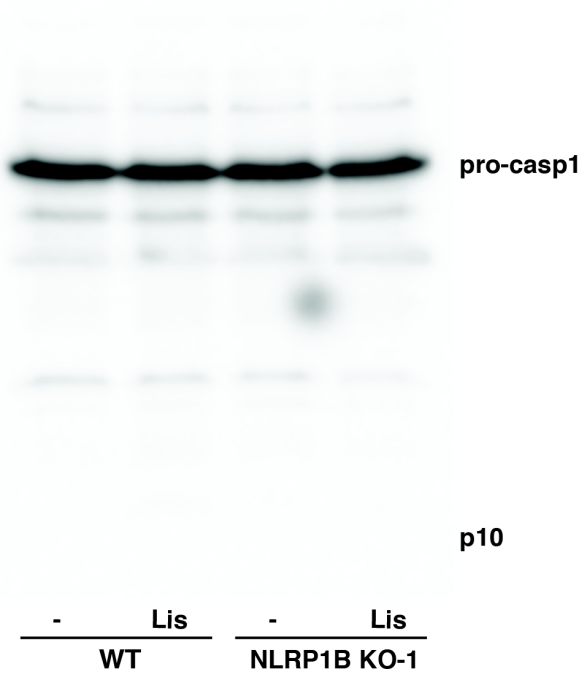**B**Short exposure: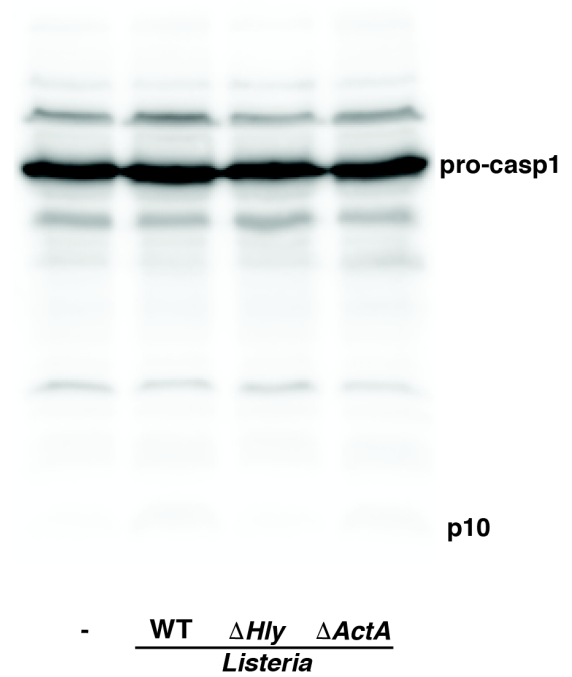Long exposure: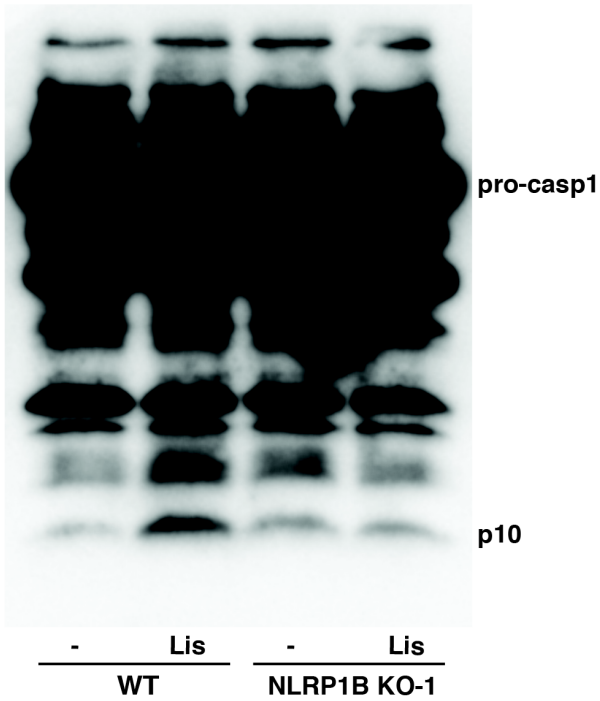Long exposure: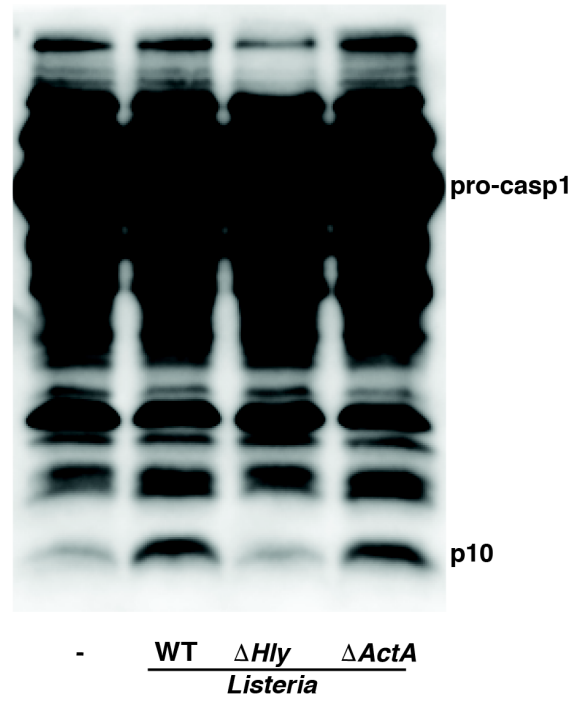

Fig. S3. Long and short exposures of entire blots used in Fig. 5.

**A**

Short exposure:

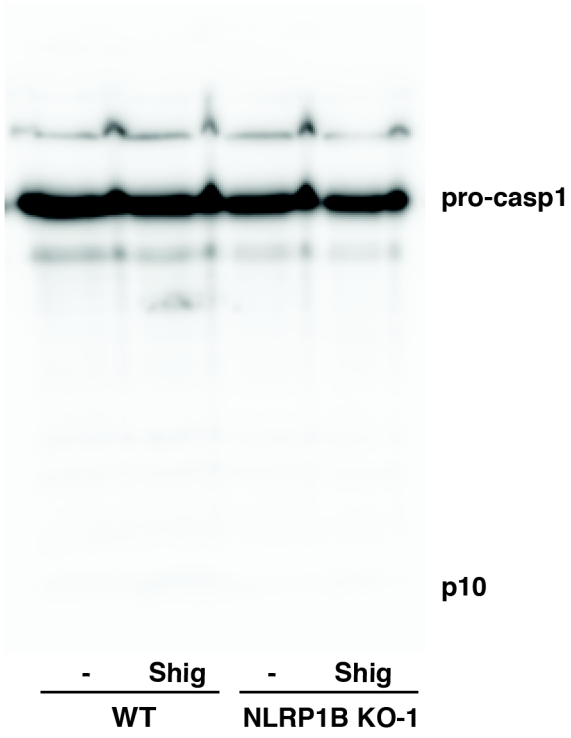

Long exposure:

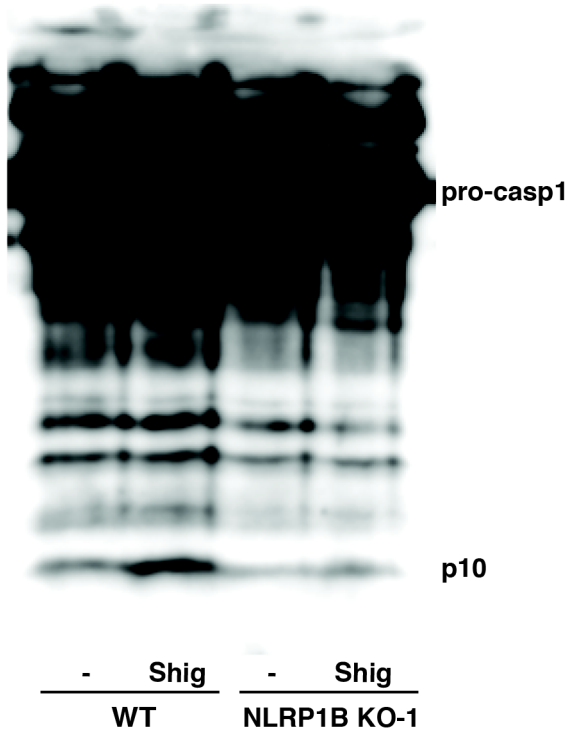

Fig. S4. Long and short exposures of entire blots used in Fig. 6.
